# Supplementary material for: Real-Time Ligand Binding of Fluorescent VEGF-A Isoforms that Discriminate between VEGFR2 and NRP1 in Living Cells
Source: PubMed Central journal article supplement (PMC6200776; doi:10.1016/j.chembiol.2018.06.012), 2018-10-18
Supplement: mmc1.pdf [file mmc1.pdf]

**Cell Chemical Biology, Volume 25**

**Supplemental Information**

**Real-Time Ligand Binding of Fluorescent  
VEGF-A Isoforms that Discriminate  
between VEGFR2 and NRP1 in Living Cells**

**Chloe J. Peach, Laura E. Kilpatrick, Rachel Friedman-Ohana, Kris Zimmerman, Matthew B. Robers, Keith V. Wood, Jeanette Woolard, and Stephen J. Hill**

# Supplementary Information.

## Real-time ligand binding to VEGFR2 and Neuropilin-1 with fluorescent VEGF-A isoforms that discriminate between the two cell surface proteins in living cells

Chloe J. Peach<sup>1,2,#</sup>, Laura E. Kilpatrick<sup>1,2,#</sup>, Rachel Friedman-Ohana<sup>3</sup>, Kris Zimmerman<sup>3</sup>, Matthew B. Robers<sup>3</sup>, Keith V. Wood<sup>3</sup>, Jeanette Woolard<sup>1,2,\*</sup>, Stephen J. Hill<sup>1,2,\*</sup>

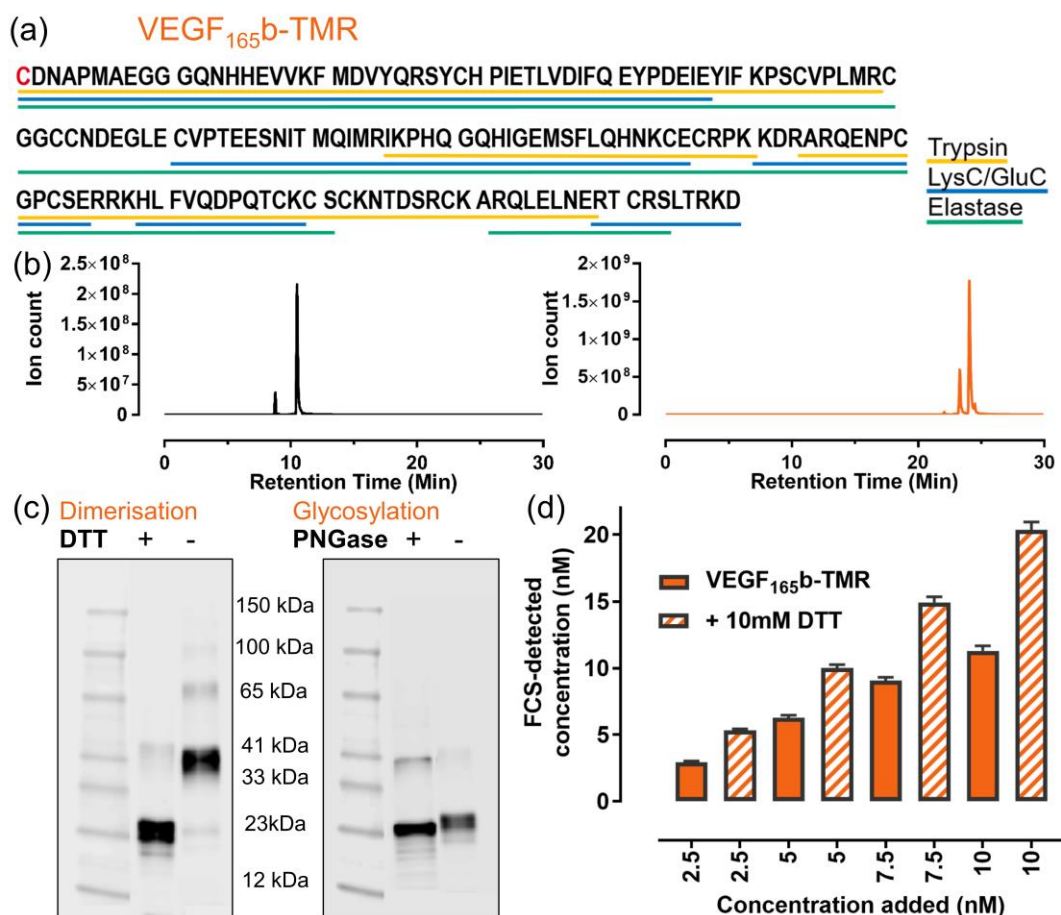

**Figure S1. LC-MS/MS analysis of VEGF<sub>165</sub>b-TMR digested with multiple proteases.** (Relates to Figure 1). (a) Peptide coverage achieved by digestion with trypsin, LysC/GluC and elastase proteases. The N-terminal cysteine is marked in red. None of the other 14 residues presented in the VEGF<sub>165</sub>b protomer were labelled. Protein identity was confirmed by searching the MS/MS spectra using the Mascot search engine (Matrix Science Inc, Boston, USA) against a human database (SwissProt). The highest scoring hit was the VEGF sequence. (b) LC-MS/MS analysis of the peptide containing the N terminal cysteine (CDNAPMAEGGGQNHHEVVK) derived from VEGF<sub>165</sub>b-TMR (right panel) and VEGF<sub>165</sub>b (left panel) that were purified in the same manner and digested with trypsin protease. Retention times and mono-isotopic masses are given in Supplementary Table 1. (c) Fluorescence SDS-PAGE analysis of VEGF<sub>165</sub>b-TMR ( $E_{ex}$ =532 nm;  $E_{em}$ =580 nm) in the presence or absence of 100mM DTT and with or without deglycosylation by PNGase. (d) VEGF<sub>165</sub>b-TMR concentration determined using fluorescence correlation spectroscopy (FCS) in the presence or absence of 10mM DTT. N=4-6 separate experiments.

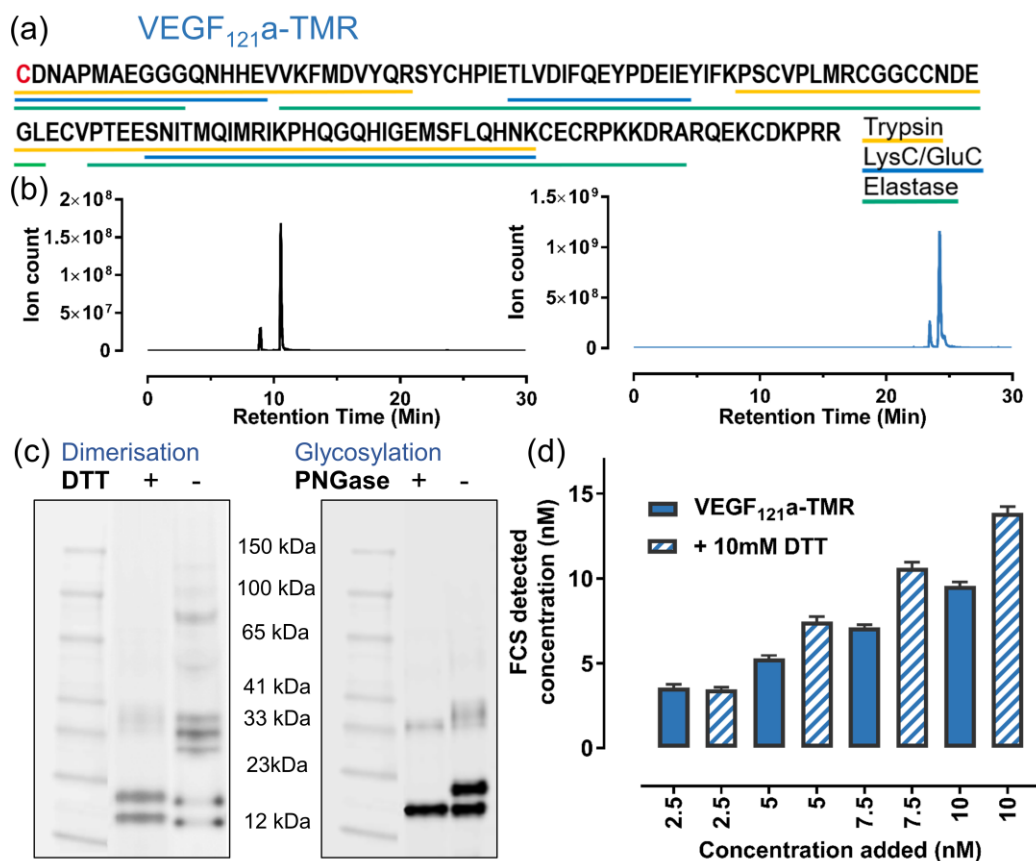

**Figure S2. LC-MS/MS analysis of VEGF<sub>121a</sub>-TMR digested with multiple proteases.** (Relates to Figure 1). (a) Peptide coverage achieved by digestion with trypsin, LysC/GluC and elastase proteases. The N-terminal cysteine is marked in red. None of the other 8 residues presented in the VEGF<sub>121a</sub> protomer were labelled. Protein identity was confirmed by searching the MS/MS spectra using the Mascot search engine (Matrix Science Inc, Boston, USA) against a human database (SwissProt). The highest scoring hit was the VEGF sequence. (b) LC-MS/MS analysis of the peptide containing the N terminal cysteine (CDNAPMAEGGGQNHHEVVK) derived from VEGF<sub>121a</sub>-TMR (right panel) and VEGF<sub>121a</sub> (left panel) that were purified in the same manner and digested with trypsin protease. Retention times and mono-isotopic masses are given in Supplementary Table 1. (c) Fluorescence SDS-PAGE analysis of VEGF<sub>121a</sub>-TMR ( $E_{ex}$ =532 nm;  $E_{em}$ =580 nm) in the presence or absence of 100mM DTT and with or without deglycosylation by PNGase. (d) VEGF<sub>121a</sub>-TMR concentration in the presence or absence of 10mM DTT quantified using fluorescence correlation spectroscopy (FCS). N=3-4 separate experiments.

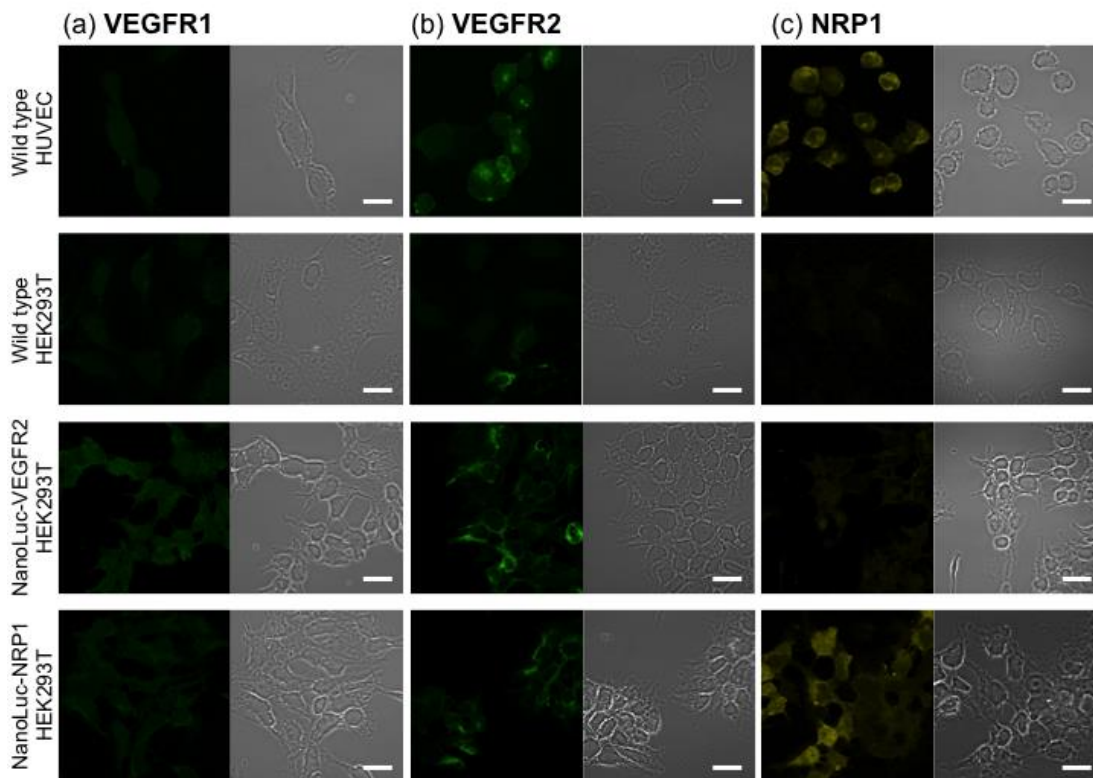

**Figure S3. Immunofluorescence labelling of VEGFR1, VEGFR2 and Neuropilin-1 (NRP1) expression in HEK293 cells and HUVECs.** (Relates to Figure 2). Immunofluorescence staining for either (A) VEGFR1 (green), (B) VEGFR2 (green) or (B) Neuropilin-1 (yellow), alongside phase contrast images, in fixed cells on coverslips imaged using the Zeiss Confocal LSM880 (63X magnification). Scale bars shown as 20 $\mu$ m and images are representative of n=3.

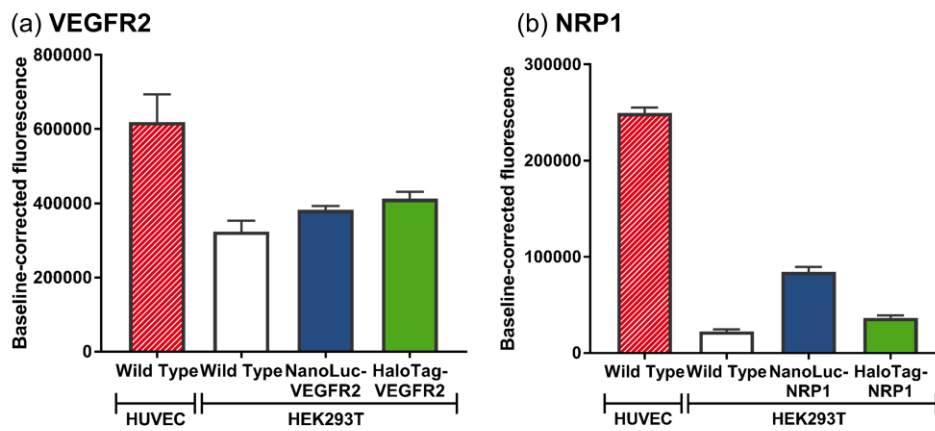

**Figure S4. Relative expression of VEGFR2 and NRP1 in endothelial and transfected cell lines.** (Relates to Figure 2). Quantified immunofluorescence staining for (A) VEGFR2 or (B) Neuropilin-1, in fixed HUVEC or HEK293T cells imaged in 96-well plates using ImageXpress Micro (20x magnification). Fluorescence was quantified on a per cell basis and baseline-corrected for non-specific fluorescence per experiment (secondary antibody only). Data shown as mean $\pm$ S.E.M. from 5 independent experiments.

**Table S1.** (Relates to Figure 1).

**LS-MS/MS profiles for unlabelled peptide fragments obtained following protease digestion of VEGF or VEGF-TMR.**

| Peptide sequence    | Digest    | VEGF isoform         | Mass/charge (m/z) | Charge (z) | Mass [M+H]* | Retention Time (Min) | Peak Area | Sample     | %   | % Labelled |
|---------------------|-----------|----------------------|-------------------|------------|-------------|----------------------|-----------|------------|-----|------------|
| CDNAPMAEGGGQNHHEVVK | Trypsin   | VEGF <sub>165b</sub> | 498.97            | 4          | 1992.89     | 10.5                 | 1.36E+08  | Labelled   | 2.9 | 97.1       |
| CDNAPMAEGGGQNHHEVVK | Trypsin   | VEGF <sub>165b</sub> | 498.97            | 4          | 1992.89     | 10.5                 | 4.66E+09  | Unlabelled | 100 | n/a        |
| CDNAPMAEGGGQNHHEVVK | Trypsin   | VEGF <sub>121a</sub> | 498.97            | 4          | 1992.89     | 10.5                 | 6.20E+08  | Labelled   | 6.1 | 93.9       |
| CDNAPMAEGGGQNHHEVVK | Trypsin   | VEGF <sub>121a</sub> | 498.97            | 4          | 1992.89     | 10.3                 | 1.01E+10  | Unlabelled | 100 | n/a        |
| CDNAPMAE            | LysC/GluC | VEGF <sub>165b</sub> | 425.66            | 2          | 850.31      | 13.7                 | 5.26E+06  | Labelled   | 3.5 | 96.5       |
| CDNAPMAE            | LysC/GluC | VEGF <sub>165b</sub> | 425.66            | 2          | 850.31      | 13.6                 | 1.52E+08  | Unlabelled | 100 | n/a        |
| CDNAPMAE            | LysC/GluC | VEGF <sub>121a</sub> | 425.66            | 2          | 850.31      | 13.5                 | 1.14E+07  | Labelled   | 1.2 | 98.8       |
| CDNAPMAE            | LysC/GluC | VEGF <sub>121a</sub> | 425.66            | 2          | 850.31      | 13.6                 | 9.23E+08  | Unlabelled | 100 | n/a        |

LS-MS/MS profiles for unlabelled peptide fragments obtained following protease digestion of VEGF or VEGF-TMR. The labeling efficiency of VEGF<sub>165b</sub>-TMR or VEGF<sub>121a</sub>-TMR was determined by comparing the integrated peak areas of the unmodified proteolytic peptides in the labelled and unlabelled samples that were digested with trypsin or LysC/GluC. The analysis indicated 94-99% labelling efficiency. \*Mono-isotopic mass at a single charge assuming the peptide takes up a single proton. Mono-isotopic mass [M+H] is calculated as  $(m/z) \cdot z - (z-1)$ .

**Table S2** (relates to Figure 1).

**LS-MS/MS profiles for labelled peptide fragments obtained following protease digestion of VEGF or VEGF-TMR.**

| Peptide sequence    | Digest    | VEGF isoform         | Mass/charge (m/z) | Charge (z) | Mass of labelled peptide [M+H]* | Mass of unlabelled peptide [M+H]* | Mass Difference |
|---------------------|-----------|----------------------|-------------------|------------|---------------------------------|-----------------------------------|-----------------|
| CDNAPMAEGGGQNHHEVVK | Trypsin   | VEGF <sub>165b</sub> | 937.39            | 3          | 2810.16                         | 1992.89                           | 817.27          |
| CDNAPMAEGGGQNHHEVVK | Trypsin   | VEGF <sub>121a</sub> | 937.39            | 3          | 2810.16                         | 1992.80                           | 817.27          |
| CDNAPMAE            | LysC/GluC | VEGF <sub>165b</sub> | 834.30            | 2          | 1667.59                         | 850.31                            | 817.28          |
| CDNAPMAE            | LysC/GluC | VEGF <sub>121a</sub> | 834.30            | 2          | 1667.59                         | 850.31                            | 817.28          |

LS-MS/MS profiles for labelled peptide fragments obtained following protease digestion of VEGF or VEGF-TMR. Observed mass of the labelled peptides containing the N-terminal cysteine confirmed a mass increase of 817 Da due to covalent attachment of the 6-TMR-PEG-CBT.

\*Mono-isotopic mass at a single charge assuming the peptide takes up a single proton. \*Mono-isotopic mass [M+H] is calculated as  $(m/z) \times z - (z-1)$ .

**Table S3. Competition binding pK<sub>i</sub> values for VEGF-A isoforms binding to VEGFR2 and NRP1** (relates to Figures 3 and 4).

|                      | NanoLuc-VEGFR2                 | NanoLuc-VEGFR2                 | NanoLuc-VEGFR2                 | NanoLuc-NRP1                   |
|----------------------|--------------------------------|--------------------------------|--------------------------------|--------------------------------|
| <b>VEGF isoform</b>  | <b>VEGF<sub>165a</sub>-TMR</b> | <b>VEGF<sub>165b</sub>-TMR</b> | <b>VEGF<sub>121a</sub>-TMR</b> | <b>VEGF<sub>165a</sub>-TMR</b> |
| VEGF-Ax              | 9.20 ± 0.02                    | 9.57 ± 0.03                    | 9.65 ± 0.06                    | ND                             |
| VEGF <sub>165a</sub> | 9.57 ± 0.04                    | 9.73 ± 0.09                    | 9.54 ± 0.05                    | 9.54 ± 0.21                    |
| VEGF <sub>165b</sub> | 9.07 ± 0.02                    | 9.61 ± 0.06                    | 9.28 ± 0.10                    | ND                             |
| VEGF <sub>121a</sub> | 9.30 ± 0.06                    | 9.58 ± 0.18                    | 9.31 ± 0.08                    | ND                             |
| VEGF <sub>145a</sub> | 8.83 ± 0.03                    | 8.92 ± 0.08                    | 8.82 ± 0.08                    | 7.82 ± 0.15                    |
| VEGF <sub>189a</sub> | 9.13 ± 0.03                    | 8.92 ± 0.03                    | 9.06 ± 0.09                    | 8.60 ± 0.14                    |
| VEGF <sub>111a</sub> | 9.66 ± 0.13                    | 9.89 ± 0.15                    | 9.98 ± 0.05                    | ND                             |

Summary of binding affinities (pK<sub>i</sub>) of unlabelled VEGF-A isoforms determined from inhibition of the binding of VEGF<sub>165a</sub>-TMR, VEGF<sub>165b</sub>-TMR or VEGF<sub>121a</sub>-TMR to NanoLuc-VEGFR2 and NanoLuc-NRP1. Data are expressed as mean ± S.E.M determined from 5 independent experiments. ND = not determined due to lack of significant inhibition of binding with 30nM unlabelled VEGF isoform.
